# Supplementary material for: Sex differences in the risk of cataract associated with type 2 diabetes: a Mendelian randomization study
Source: medRxiv preprint, doi:10.1101/2021.08.05.21261684, version 1 (2021-08-07)
Supplement: supp_fig [file 261684_file02.docx]

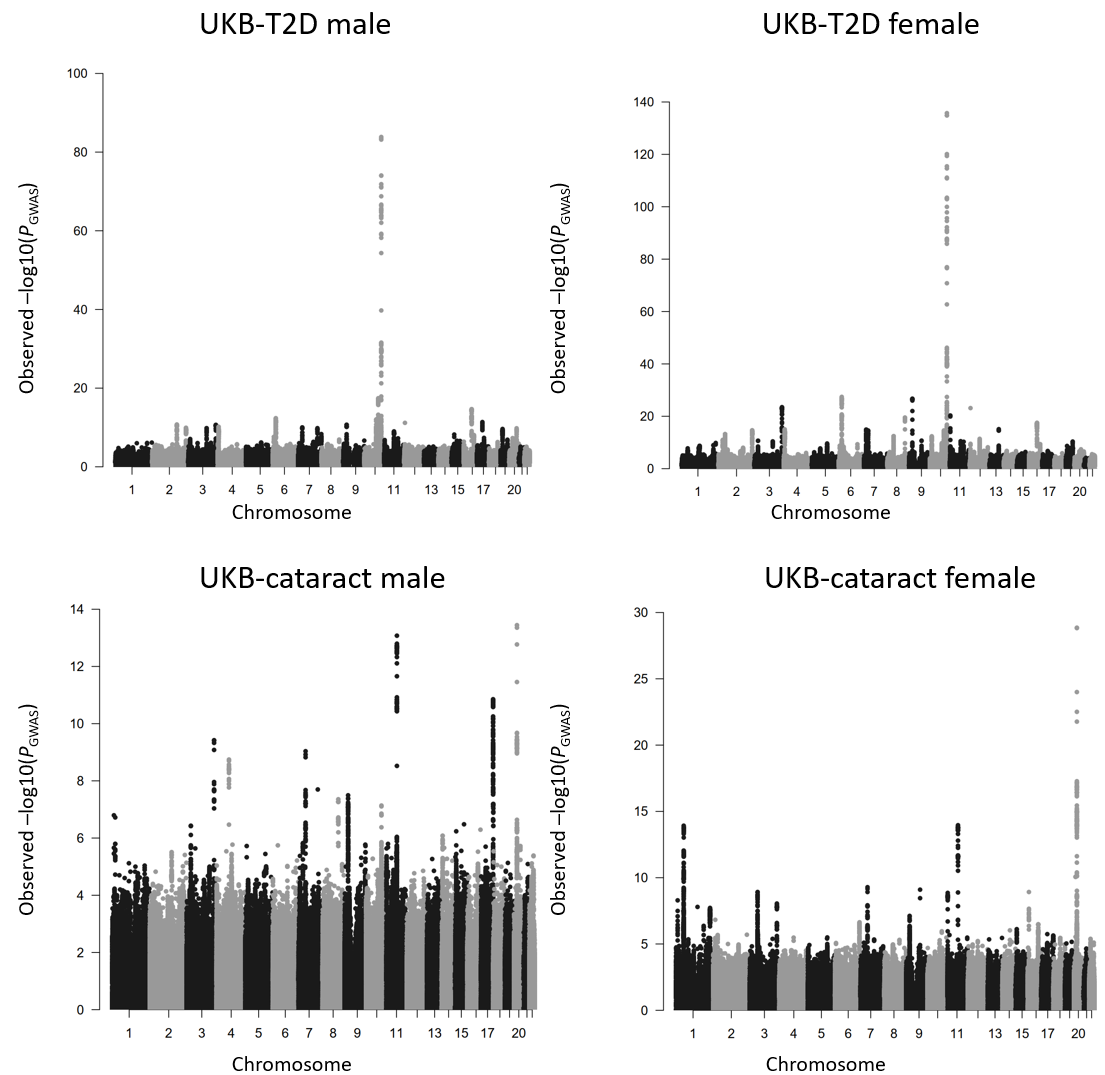


Figure S1. Manhattan plots of the sex-stratified SNP associations for T2D and cataract estimated from GWAS analysis based on the European cohort from UK Biobank.


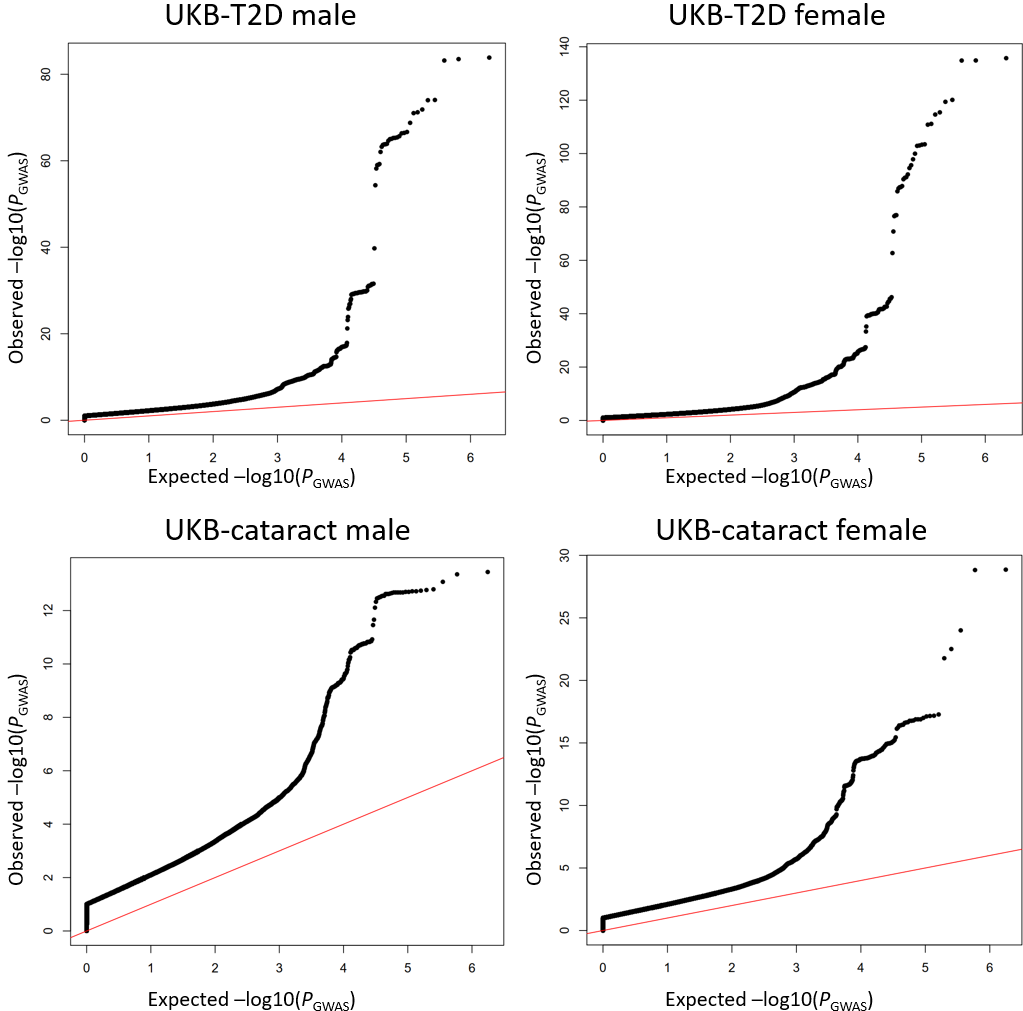


Figure S2. The quantile–quantile plots of the sex-stratified GWAS for T2D and cataract based on the UK Biobank European cohort. The red line is the diagonal line of the quantile-quantile plot.
